# Supplementary material for: Comparative assessment of enamel remineralisation on the surface microhardness of demineralized enamel - an in vitro study
Source: PeerJ. 2022 Oct 7;10:e14098. doi: 10.7717/peerj.14098 (PMC9549882; doi:10.7717/peerj.14098)
Supplement: Supplemental Information 1 [file peerj-10-14098-s001.xlsx]

## Sheet: Sheet1
control group 1	1	2	3	4	5	6	7	8	9	10
baseline	66	80	83	70.9	73	65	72.5	81.7	72	65

## Sheet: Sheet2
group 2	1	2	3	4	5	6	7	8	9	10
baseline	71.5	60	69	65	73.2	80	60.3	69.2	77	80
demineralisation	60.9	52	60.3	54	64	78.8	51	60	65	70.9
remineralisation	69.3	59.1	69.9	64.4	74	79.2	59.7	69.3	76.2	79.2

## Sheet: Sheet3
group 3	1	2	3	4	5	6	7	8	9	10
baseline	54.2	66.5	53	74.7	73	70.5	68.3	78.9	79	71
demineralisation	44.5	55	44.5	62	61.5	62	79	69	70	62.5
remineralisation	52	64	50.5	73	71.9	68	66.5	76.6	77.2	69
